# Supplementary material for: Highly uniform platinum photodeposited hollow mesoporous titania nanoparticles for photocatalytic degradation of phenol
Source: Royal Society of Chemistry journal article supplement (doi:10.1039/d4en00156g), 2024-01-01
Supplement: d4en00156g1.pdf [file d4en00156g1.pdf]

## SUPPORTING INFORMATION

### Highly Uniform Platinum Photodeposited Hollow Mesoporous Titania Nanoparticles for Photocatalytic Degradation of Phenol

Dauletkerey Kudaibergen<sup>a</sup>, Geun Young Kim<sup>a</sup>, Hyun-Seok Choe<sup>a</sup>, Jeong-Min Park<sup>a</sup>, Hangil Kim<sup>a</sup>, Donghyun Lee<sup>b</sup>, Heewoo Jeon<sup>b</sup>, Changha Lee<sup>b</sup> and Jae-Hyuk Kim<sup>a\*</sup>.

<sup>a</sup>Department of Chemical and Environmental Engineering, Pusan National University, Busan, 46241, Republic of Korea

<sup>b</sup>School of Chemical and Biological Engineering, Institute of Chemical Process (ICP), Institute of Engineering Research, Seoul National University, 1 Gwanak-ro, Gwanak-gu, Seoul 08826, Republic of Korea

\*Corresponding Author: Jae-Hyuk Kim, Ph.D., Department of Chemical and Environmental Engineering, Pusan National University, Busan 46241, Republic of Korea. Tel.: +82-51-510-2312. E-mail: jaehyuk.kim@pusan.ac.kr

KEYWORDS: Hollow mesoporous titania, Photocatalysis, Phenol degradation, Platinum photodeposition, Radical mechanism

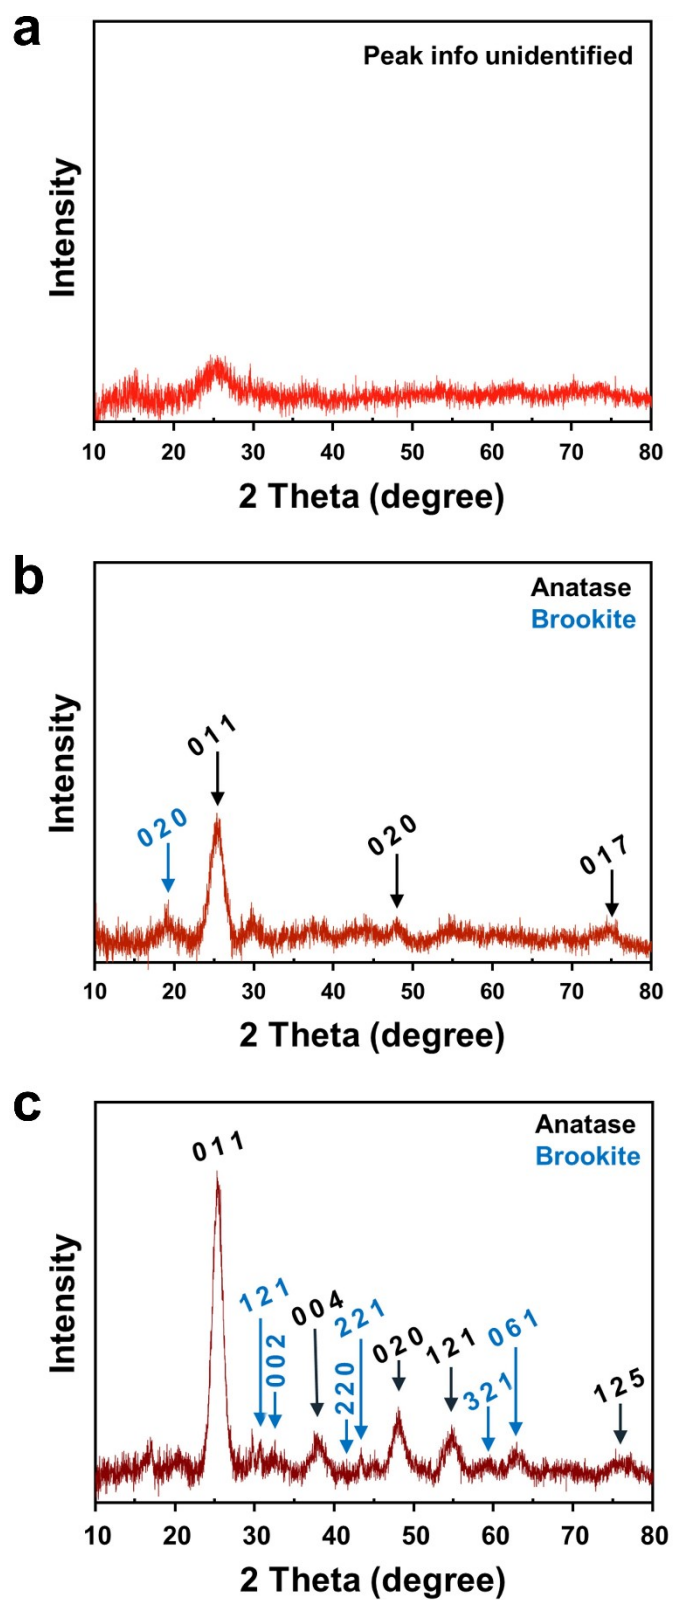

Fig. S1. XRD patterns of c-HMTN calcined under (a) 500 °C, (b) 610 °C, (c) 720 °C

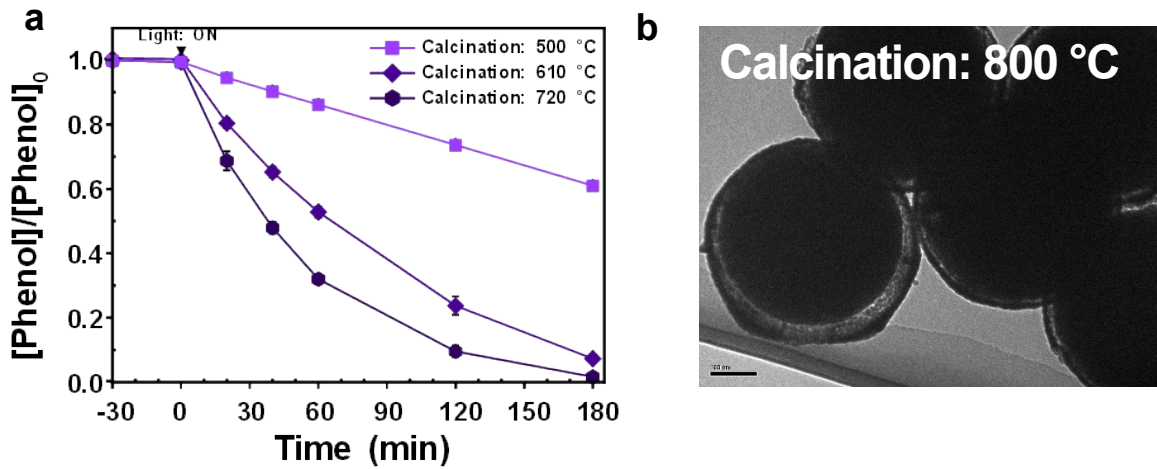

Fig. S2. a) Photocatalytic activity of c-HMTN corresponding to different calcination temperatures b) TEM image of c-HMTN calcined at 800 °C

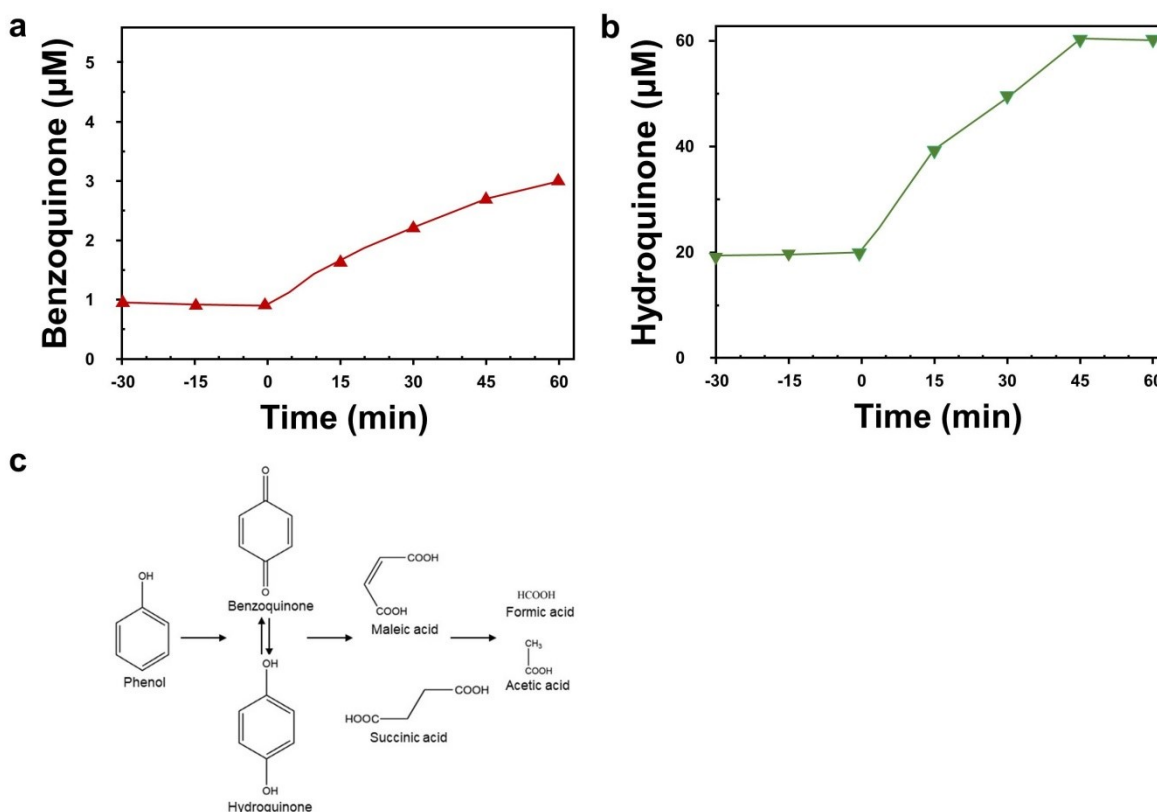

Fig. S3. a) Phenol degradation primary product HPLC test of a) Benzoquinone b) Hydroquinone and c) phenol degradation overall pathway

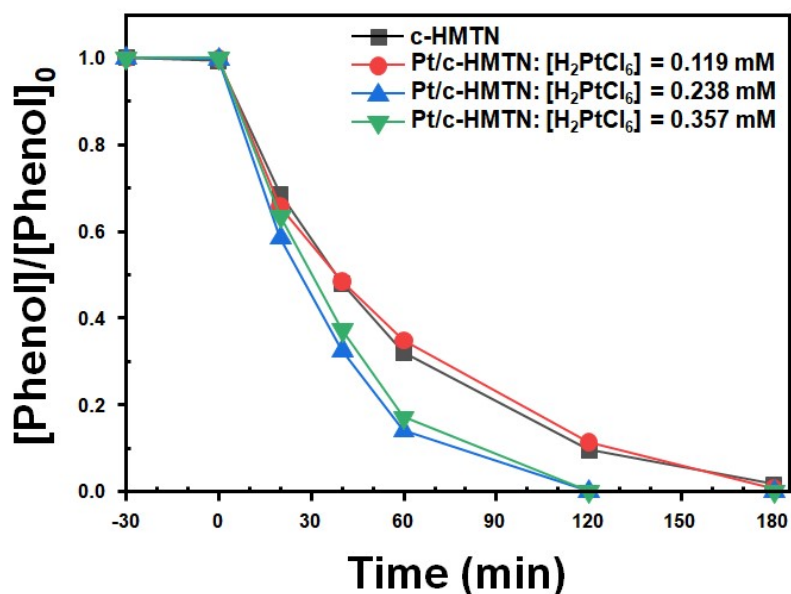

**Fig. S4.** Effect of Pt precursor concentration on Pt/c-HMTN catalytic performance. ([Catalyst] = 500 ppm; [Phenol]<sub>0</sub> = 10 ppm; Dark phase time = 30 min; UV power = 20 W; Reaction time = 180 min)

**Table S1**

| Photocatalyst                             | Shape           | Average size                | Light source | Catalytic activity* | Reference |
|-------------------------------------------|-----------------|-----------------------------|--------------|---------------------|-----------|
|                                           | Uniformity      | Uniformity                  |              |                     |           |
| PAN-CNT/TiO <sub>2</sub> -NH <sub>2</sub> | Nanotube        | D: ~500 nm<br>L: several mm | UV           | 20 min              | 1         |
|                                           | Middle          | Middle                      |              |                     |           |
| SnO <sub>2</sub> :Sb                      | Random-shaped   | ~2.3 nm                     | UV-Vis       | 150 min             | 2         |
|                                           | Low             | Middle                      |              |                     |           |
| Au, Pt modified ZnO                       | Hollow sphere   | Up to 1 μm                  | UV           | 120 min             | 3         |
|                                           | Low             | Low                         |              |                     |           |
| Degussa P25                               | Random-shaped   | ~25 nm                      | UV-Vis       | 300 min             | 4         |
|                                           | Low             | Low                         |              |                     |           |
| Mesoporous Pd@mTiO <sub>2</sub>           | Core-shell      | ~20 nm                      | UV           | 120 min             | 5         |
|                                           | Low             | Low                         |              |                     |           |
| N-doped TiO <sub>2</sub>                  | Unspecified     | Unspecified                 | UV           | 210 min             | 6         |
| F-doped TiO <sub>2</sub>                  | Hollow nanocube | 200~400 nm                  | Vis          | 60 min              | 7         |
|                                           | Middle          | Middle                      |              |                     |           |
| Pt/c-HMTN (This study)                    | Hollow sphere   | 450~500 nm                  | UV-Vis       | 60 min              |           |
|                                           | High            | High                        |              |                     |           |

\*Average time to degrade 95% of initial phenol

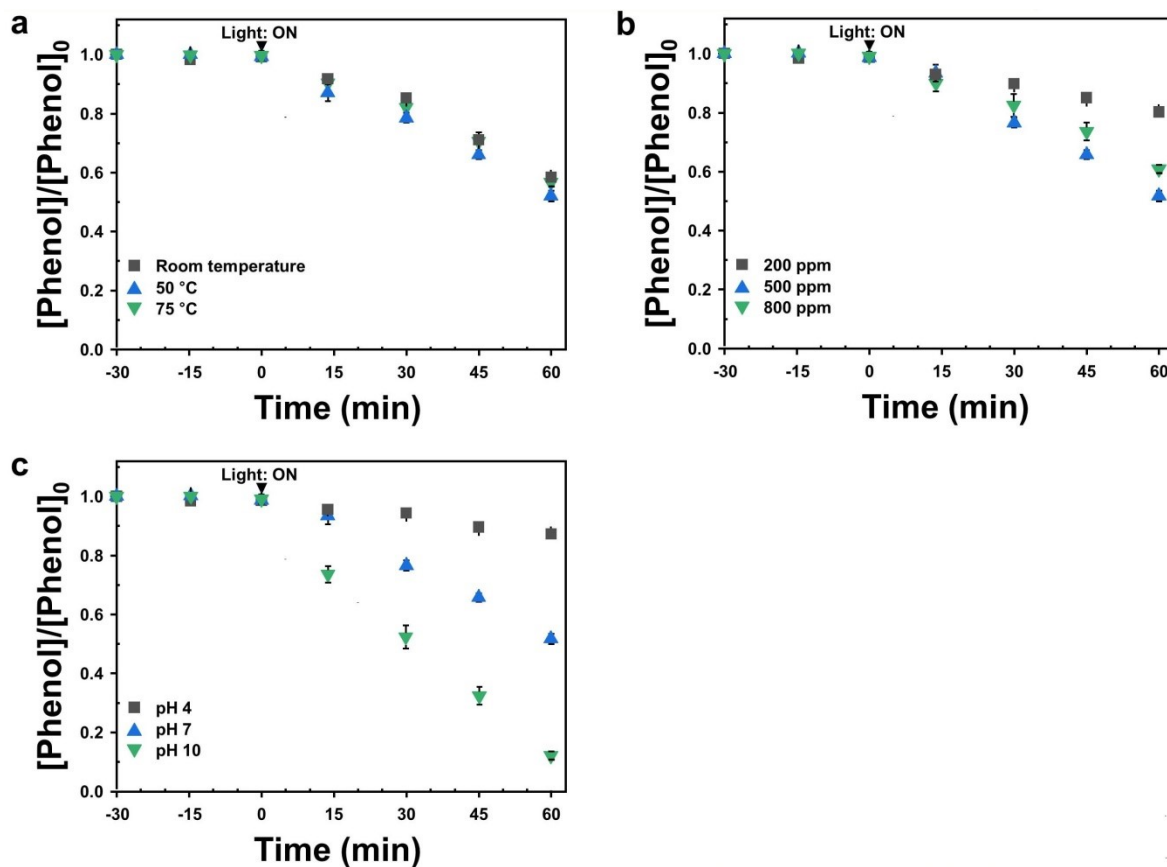

**Fig. S5.** a) Photocatalytic activity of Pt/c-HMTN corresponding to a) reaction temperatures, b) catalyst dosage and c) pH ( $[\text{Phenol}]_0 = 10$  ppm; Dark phase time = 30 min; Solar simulator power = 1 SUN; Reaction time = 60 min)

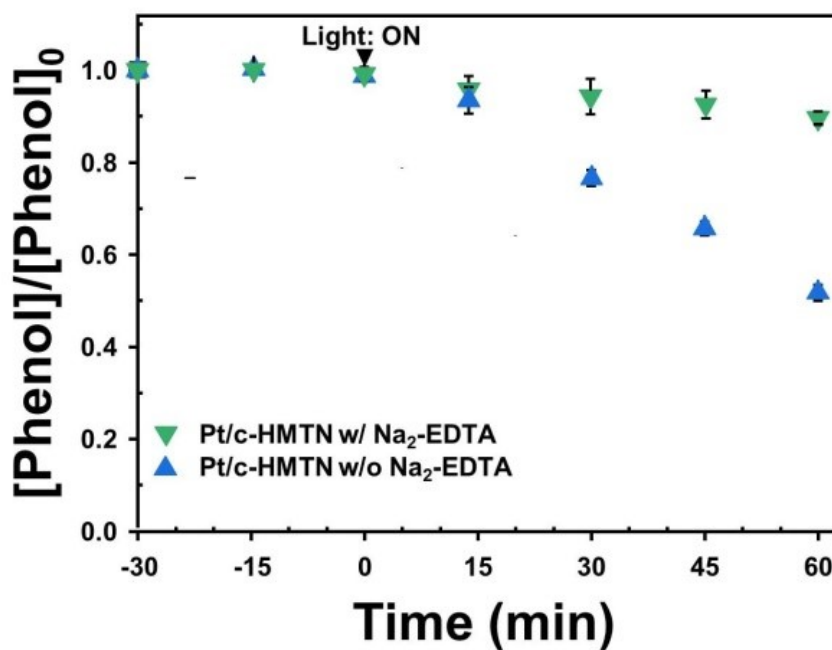

**Fig. S6.** Hole-trapping scavenger test of Pt/c-HMTN in the presence  $\text{Na}_2\text{-EDTA}$  versus Pt/c-HMTN without adding  $\text{Na}_2\text{-EDTA}$ . ( $[\text{Catalyst}] = 500$  ppm;  $[\text{Phenol}]_0 = 10$  ppm;  $[\text{Na}_2\text{-EDTA}] = 20$  mM; Dark phase time = 30 min; Solar simulator power = 1 SUN; Reaction time = 60 min)

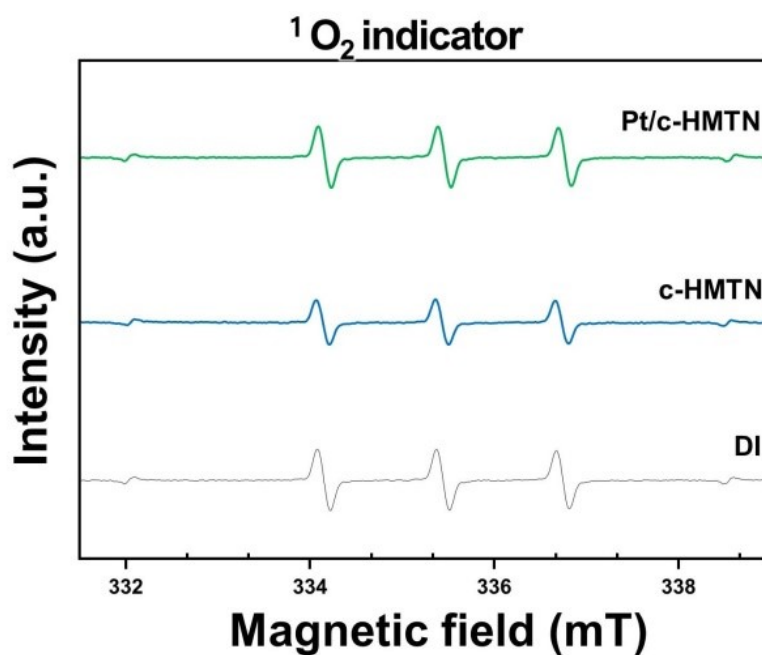

Fig. S7. EPR spectra of Blank (DI), c-HMTN vs Pt/c-HMTN for  $^1\text{O}_2$  signal peaks in the presence of light

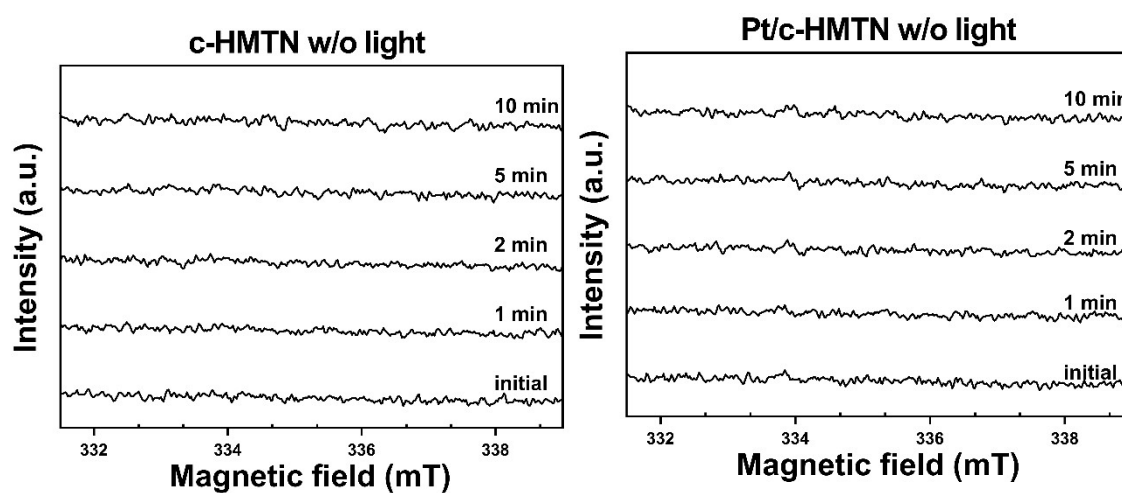

Fig. S8. EPR spectra of c-HMTN, Pt/c-HMTN at different timeframes without the presence of light

#### References

1. A. Mohamed, S. Yousef, W.S. Nasser, T. A. Osman, A. Knebel, E.P.V. Sánchez & T. Hashem. Rapid photocatalytic

degradation of phenol from water using composite nanofibers under UV. *Environmental Science Europe* 2020, 32, 160.

2. A.M. Al-Hamdi, M. Sillanpää, T. Bora, J. Dutta. Efficient photocatalytic degradation of phenol in aqueous solution by SnO<sub>2</sub>:Sb nanoparticles. *Applied Surface Science* 2020, 370, 229-236.

3. Z. Kovács, V. Márta, T. Gyulavári, Á. Ágoston, L. Baia, Z. Pap, K. Hernadi. Noble metal modified (002)-oriented ZnO hollow spheres for the degradation of a broad range of pollutants. *Journal of Environmental Chemical Engineering* 2022, 10, 107655.

4. M. L. de Souza, D. P. dos Santos and P. Corio. Localized surface plasmon resonance enhanced photocatalysis: an experimental and theoretical mechanistic investigation. *RSC Advances* 2018, 8, 28753

5. M. T. Yilleng, N. Artioli, D. Rooney, H. Manyar. Continuous flow photocatalytic degradation of phenol using Palladium@Mesoporous TiO<sub>2</sub> Core@Shell nanoparticles. *Water* 2023, 15, 2975.

6. S. Safni, M. R. Wahyuni, K. Khoiriah, Y. Yusuf. Photodegradation of phenol using N-doped TiO<sub>2</sub> catalyst. *Molekul* 2019, 14, 1, 447

7. X. Kang, X-Z. Song, Y. Han, J. Cao, Z. Tan. Defect-engineered TiO<sub>2</sub> hollow spiny nanocubes for phenol degradation under visible light Irradiation. *Scientific Reports* 2018, 8:5904
